# Supplementary material for: High-throughput quantitation of SARS-CoV-2 antibodies in a single-dilution homogeneous assay
Source: PubMed Central journal article supplement (PMC8192771; doi:10.1038/s41598-021-91300-5), 2021-06-10
Supplement: 41598_2021_91300_MOESM1_ESM.pdf [file 41598_2021_91300_MOESM1_ESM.pdf]

## Supplementary materials for

High-throughput quantitation of SARS-CoV-2 antibodies in a single-dilution homogeneous assay

### Authors

Markus H. Kainulainen<sup>1</sup>, Eric Bergeron<sup>1</sup>, Payel Chatterjee<sup>1</sup>, Asheley P. Chapman<sup>2</sup>, Joo Lee<sup>3</sup>, Asiya Chida<sup>3</sup>, Xiaoling Tang<sup>3</sup>, Rebekah E. Wharton<sup>4</sup>, Kristina B. Mercer<sup>5</sup>, Marla Petway<sup>3</sup>, Harley M. Jenks<sup>1</sup>, Timothy D. Flietstra<sup>1</sup>, Amy J. Schuh<sup>1</sup>, Panayampalli S. Satheshkumar<sup>6</sup>, Jasmine M. Chaitram<sup>7</sup>, S. Michele Owen<sup>8</sup>, Laura K. McMullan<sup>1</sup>, Mike Flint<sup>1</sup>, M. G. Finn<sup>2</sup>, Jason M. Goldstein<sup>3</sup>, Joel M. Montgomery<sup>1</sup>, Christina F. Spiropoulou<sup>1\*</sup>

### Affiliations:

<sup>1</sup> Viral Special Pathogens Branch, Division of High-Consequence Pathogens and Pathology, Centers for Disease Control and Prevention, 1600 Clifton Rd, Atlanta, GA 30329, USA

<sup>2</sup> School of Chemistry and Biochemistry, School of Biological Sciences, Georgia Institute of Technology, 901 Atlantic Dr., Atlanta, GA 30332, USA

<sup>3</sup> Reagent and Diagnostic Services Branch, Division of Scientific Resources, Centers for Disease Control and Prevention, 1600 Clifton Rd, Atlanta, GA 30329, USA

<sup>4</sup> Emergency Response Branch, Division of Laboratory Sciences, Centers for Disease Control and Prevention, 4770 Buford Hwy., Atlanta, GA 30341, USA

<sup>5</sup> Newborn Screening & Molecular Biology Branch, Division of Laboratory Sciences, Centers for Disease Control and Prevention, 4770 Buford Hwy., Atlanta, GA 30341, USA

<sup>6</sup> Poxvirus and Rabies Branch, Division of High-Consequence Pathogens and Pathology, Centers for Disease Control and Prevention, 1600 Clifton Rd, Atlanta, GA 30329, USA

<sup>7</sup> Division of Laboratory Systems, Centers for Disease Control and Prevention, 1600 Clifton Rd, Atlanta, GA 30329, USA

<sup>8</sup> National Center for HIV/AIDS, Viral Hepatitis, STD, and TB Prevention, Centers for Disease Control and Prevention, 1600 Clifton Rd, Atlanta, GA 30329, USA

\* Corresponding author

CDC/H18-SB/SB153

1600 Clifton Rd

Atlanta, GA 30329, USA

[ccs8@cdc.gov](mailto:ccs8@cdc.gov)

**A)**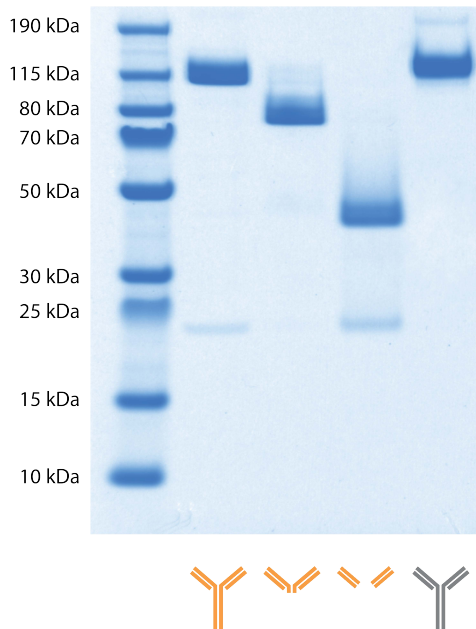**B)**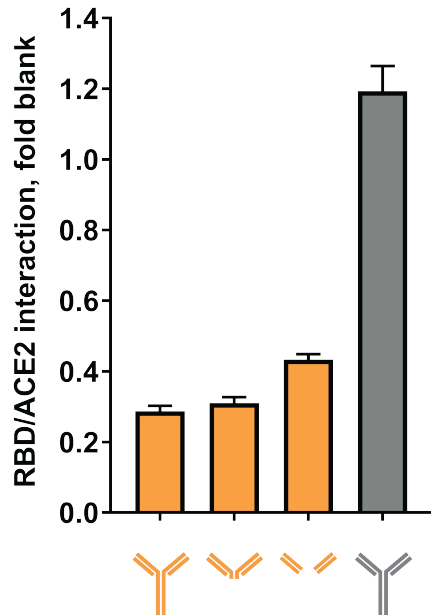

Supplementary Fig. 1: mAbs, F(ab')<sub>2</sub> and Fab fragments analyzed by SDS-PAGE; RBD/ACE2 inhibition assay.

A) SARS-CoV-2 RBD-specific mAb 3A2 (orange) was analyzed with non-reducing, non-heated SDS-PAGE, both intact and after cleavage to F(ab')<sub>2</sub> and Fab fragments as described in Materials and Methods.

A non-targeting isotype control mAb (gray) was analyzed in parallel.

B) The ability of 3A2 mAb, 3A2 F(ab')<sub>2</sub>, 3A2 Fab, and isotype control mAb to inhibit the interaction between SARS-CoV-2 RBD and its receptor ACE2 was quantified using the assay described in Materials and Methods.

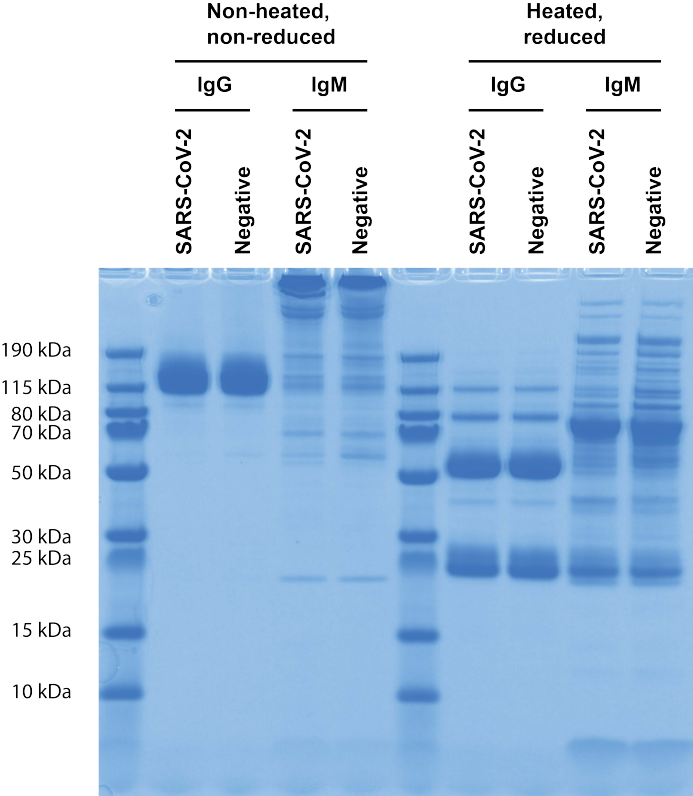

Supplementary Fig. 2: IgG and IgM antibodies purified from pooled sera of convalescent Covid-19 patients or from a control serum pool. The purification products (10  $\mu$ g/lane) were separated by SDS-PAGE on a 4–12% Bis-Tris gel with MES running buffer and stained with InstantBlue Coomassie stain.

A)

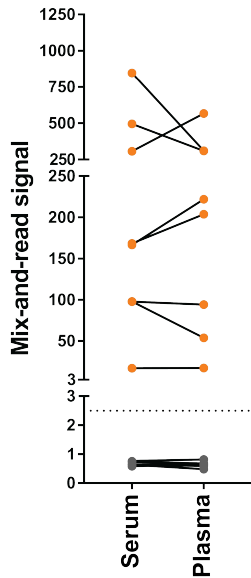

B)

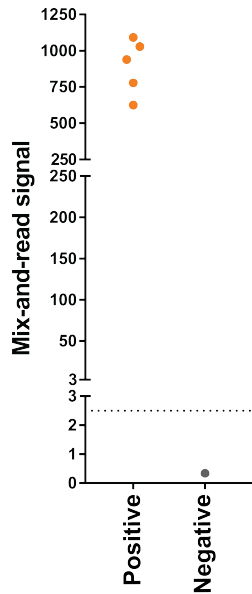

Supplementary Fig. 3: Comparing serum and plasma as sample matrices; analyzing mouse serum.

A) Paired human serum and EDTA plasma samples from 8 SARS-CoV-2-positive and 8 negative individuals were obtained from commercial sources and tested in parallel by the mix-and-read assay. Orange: samples from individuals with history of PCR-confirmed SARS-CoV-2 infection. Gray: negative control samples.

B) Analyzing mouse serum. Five serum samples from mice that were repeatedly immunized in order to generate antibodies against SARS-CoV-2 spike domains were analyzed as positive controls, and negative control serum was from an untreated mouse.

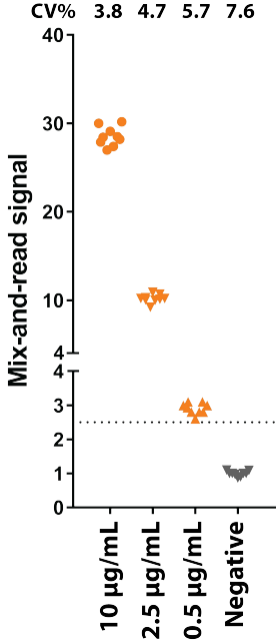

Supplementary Fig. 4: Run-to-run reproducibility of quantification controls. 3A2 mAb was spiked into normal human serum in 3 different concentrations, or serum was left without mAb for a negative control. Aliquots were stored frozen and run together with samples of interest to monitor day-to-day and run-to-run performance of the assay. Data from 9 independent runs presented. CV; coefficient of variation.

A)

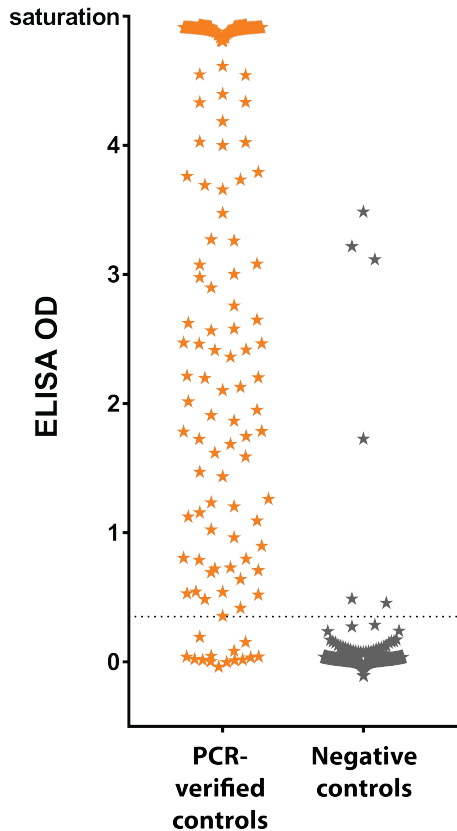

B)

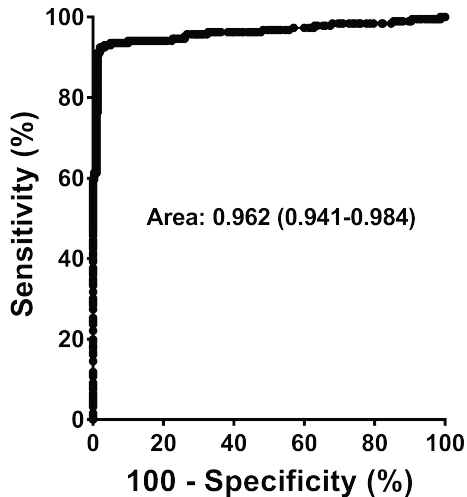

Supplementary Fig. 5. Compiled RBD ELISA results. A) OD distribution of the training set and validation set samples using 1:100 screening dilution (N = 186 samples positive for SARS-CoV-2 by nucleic acid testing and N = 300 negative controls). Values were corrected by reducing signal from wells with no antigen. B) ROC analysis. Cut-off value of 0.35 enables 92% sensitivity and 98% specificity.
